# Supplementary material
Source: publisher figshare collection journal article supplement (https://frontiersin.figshare.com/ndownloader/files/23044145)
Supplement: Supplementary file [file 23044145]

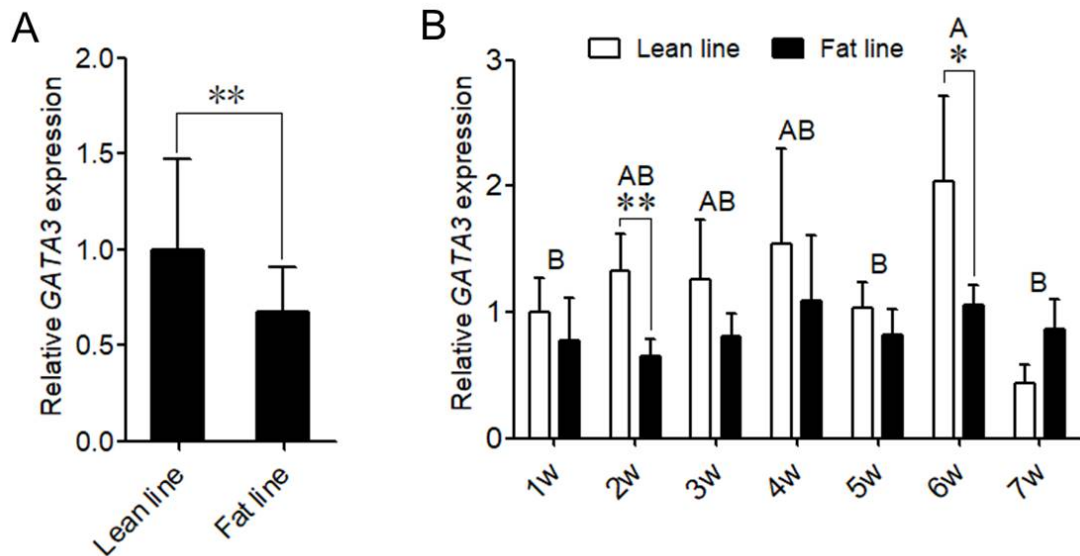

**Figure S1.** The expression of *GATA3* gene in abdominal adipose tissue. (A) qRT-PCR analysis of *GATA3* gene expression in the abdominal fat tissue of lean and fat broiler lines of NEAUHLF (n=15) from 1 to 7 weeks of age. *NONO* was used as an internal control. Values represent mean±SD from three independent experiments. The double asterisk indicates a significant difference between fat and lean broilers (student's *t*-test)  $P < 0.01$  (\*\*). (B) qRT-PCR analysis of *GATA3* gene expression in abdominal fat tissue of male broilers from 1 to 7 weeks of age (each age, each line n=5) was analyzed by qRT-PCR. *NONO* was used as an internal control. Values represent mean±SD from three independent experiments. Asterisks indicate significant differences between the fat and lean broilers (student's *t*-test)  $P < 0.05$  (\*) or  $P < 0.01$  (\*\*). The different lowercase letters above bars indicate significant differences *GATA3* expression levels among the indicated ages (GLM followed by Tukey' HSD multiple tests,  $P < 0.01$ ), 1-7 w = 1-7 weeks of age.

PCR amplification of chicken *NONO* was performed by using the primers (forward primer, 5'-GCGTTTTGCTGCTGTTATTATGAG-3'; reverse primer, 5'-TCCTTGCTGCCAGTCTGGAC-3'.
